# Supplementary material for: Musashi-1 Post-Transcriptionally Enhances Phosphotyrosine-Binding Domain-Containing m-Numb Protein Expression in Regenerating Gastric Mucosa
Source: PubMed Central journal article supplement (PMC3537613; doi:10.1371/journal.pone.0053540), 2013-01-04

**Figure S4**

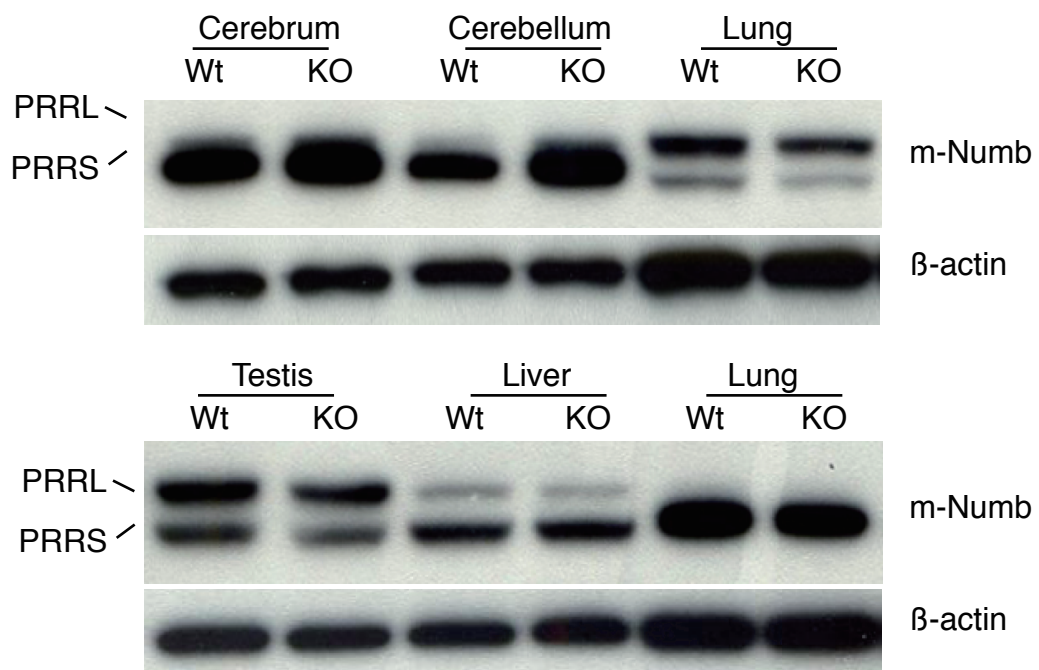

Supplement: pone.0053540.s004.pdf [file pone.0053540.s004.pdf]
